# Supplementary material
Source: PubMed Central journal article supplement (PMC4956511)
Supplement: NIHMS793006-supplement-109_2016_1426_MOESM1_ESM.pdf [file NIHMS793006-supplement-109_2016_1426_MOESM1_ESM.pdf]

# *Online Data Supplement*

## *Identifying microRNAs targeting Wnt/ $\beta$ -catenin pathway in end-stage idiopathic pulmonary arterial hypertension*

Danchen Wu<sup>1,2</sup>, C. Conover Talbot Jr.<sup>3</sup>, Qun Liu<sup>2</sup>, Zhi-Cheng Jing<sup>1,4</sup>, Rachel L. Damico<sup>6</sup>, Rubin Tuder<sup>5</sup>, Paul M. Hassoun<sup>6</sup>, Kathleen C. Barnes<sup>2</sup>, and Li Gao<sup>2</sup>

<sup>1</sup>Department of Cardiopulmonary Circulation, Shanghai Pulmonary Hospital, Tongji University School of Medicine, Shanghai, China; <sup>2</sup>Division of Allergy and Clinical Immunology, The Johns Hopkins University School of Medicine, Baltimore, MD; <sup>3</sup>JHMI Deep Sequencing and Microarray Core, The Johns Hopkins University School of Medicine, Baltimore, MD; <sup>4</sup>State Key Laboratory of Cardiovascular Disease, Fu Wai Hospital, Peking Union Medical College and Chinese Academy of Medical Science, Beijing, China; <sup>5</sup>Division of Pulmonary and Critical Care Medicine, University of Colorado Health Sciences Center, Denver, CO; <sup>6</sup>Division of Pulmonary and Critical Care Medicine, The Johns Hopkins University School of Medicine, Baltimore, MD.

*Journal of Molecular Medicine 2016*

---

### **Supplementary Methods**

#### ***RNA isolation***

Snap frozen RNA later archived human lung tissue samples were used for the miRNA and mRNA studies. For miRNA microarray screening, total RNA, including miRNAs, was isolated with RNeasy kit (QIAGEN Hilden, Germany) from lung homogenate according to the manufacturer's protocol. RNA concentration, purity and RNA integrity number (RIN) of microarray assay were determined on a Bioanalyzer (Agilent, Santa Clara CA). Only samples with RNA integrity number (RIN)  $\geq 7.0$  were acceptable for microarray analysis. The RNA for miRNA and mRNA qRT-PCR validation was isolated by a miRNeasy Mini Kit (QIAGEN, Hilden, Germany) according to the manufacturer's protocol. RNA concentration and quality were measured using a NanoDrop 2000 spectrophotometer (Thermo, Wilmington, DE, USA).

#### ***miRNA microarray***

Isolated RNA samples were hybridized to a Human miRNA Microarray V3 kit (G4872A, Agilent Technologies) platform (which contains 2,006 human miRNAs from the Sanger database, Release 19.0) according to the manufacturer's instructions in the JHMI Microarray Core Facility. Briefly, total RNA (100

ng) was first dephosphorylated with 15 units of calf intestine alkaline phosphatase at 37°C for 30min and followed by end-labeling with pCp-Cy3 (Agilent Technologies) and T4 RNA ligase (Agilent Technologies) at 16°C for 2h. Samples were then dried by SpeedVac for 2h, mixed with 10x blocking agent and 2x Hi-RPM hybridization buffer (Agilent Technologies), and hybridized at 55°C with rotation at 20 rpm in an Agilent G2545A microRNA hybridization oven for 20h. Finally, microarrays were washed and scanned using an Agilent scanner controlled by Agilent Scan Control 7.0 software. Data were acquired using Agilent Feature Extraction 9.5.3.1 software for miRNA microarray, generating a summarized GeneView signal intensity file for each sample by combining intensities of miRNA replicate probes and background subtraction.

The data from this study have been deposited in the National Center for Biotechnology Information's Gene Expression Omnibus (GEO) and are accessible through GEO Series accession number GSE67597. Data quality control was carried out by principal component analysis (PCA) and box-whisker plot. One outlier from the IPA group was excluded. Quantile normalization was applied to the dataset to minimize potential technical variation and obtain an equal distribution of probe signal intensities. The microarray signals with minimal values were thresholded to 0.001, followed by log<sub>2</sub> transformation. The miRNAs with a mean log<sub>2</sub>-transformed signal intensity less than -2 either in control or IPA group were removed before statistical analysis. Expression differences were compared using one-way ANOVA between two groups. Data quality control, transformation and analysis were performed using Partek Genomics Suite 6.6 (Partek Incorporated, St Louis, MO). Data were annotated and visualized with Spotfire DecisionSite (TIBCO Software, Boston, MA).

#### ***miRNA qRT-PCR validation***

To validate the microarray data, the expression levels of miRNAs were analyzed by qRT-PCR. miRNA-specific complementary DNA (cDNA) of each candidate miRNA was synthesized from 10ng of total RNA using the TaqMan miRNA reverse transcription kit (Applied Biosystems, Foster City, CA) according to manufacturer's protocol. Real-time PCR was carried out by Applied Biosystems 7300 Real-Time PCR System using TaqMan miRNA Assays and TaqMan Universal Master Mix II, no UNG (all from Applied Biosystems, Foster City, CA). Assays used for validation are listed in Table S2. Expression levels of miRNAs were calculated using the  $2^{-\Delta\Delta C_t}$  method, with U6 snRNA as endogenous control. We excluded reactions with a Ct value greater than 35 in the results and all samples were tested in triplicate using 96-well plates.

#### ***LNA-ISH***

In order to gain cellular resolution of miRNA expression, we performed *in situ* hybridization experiments in human IPA and control lung tissues using DIG-labeled locked-nucleic-acid (LNA)-modified DNA oligonucleotide probes specifically recognize mature miRNA species and do not hybridize with precursor miRNAs. We focused our efforts on the two dysregulated miRNAs (*miR-199b-5p* and *miR-656*) that displayed strong positive correlation with features of vascular remodeling. Locked nucleic acid - In situ hybridization was performed on formalin-fixed paraffin embedded (FFPE) tissue samples according to the manufacturer's protocol. Unstained slides were cut from tissue blocks using RNA precautions. An 8 minute proteinase-K treatment at 37°C (Dako, Denmark) was performed on the slides prior to hybridization. An Illumina hybridizer was used instead of a Dako hybridizer for the *in situ* hybridization step. Levamisole (Dako) was used to inhibit endogenous alkaline phosphatase. Counterstain was performed with 50% eosin (Richard-Allen, Kalamazoo, MI). Double digoxigenin (DIG)-labeled miRCURY LNA detection probes for *miR-199b-5p*, *miR-656* and U6 snRNA (Exiqon A/S, Denmark) were used.

### ***Selection of miRNA target genes in Wnt/ $\beta$ -catenin pathway for qRT-PCR validation***

Wnt ligand and Wnt receptor are big families, we chose *WNT7A* and *WNT16* because they are putative targets of *miR-656*, while *FZD5* and *FZD10* are their receptors, respectively. *WNT5A* and *FZD4* were selected since both were targeted by most (5 out of 6) of the validated miRNAs.

### ***Gene expression analysis***

Expression level of microRNA target genes were detected by TaqMan Gene Expression Assays (Applied Biosystems, Foster City, CA). cDNA was synthesized from 1 $\mu$ g of total RNA using the High-Capacity cDNA Reverse Transcription Kit (Applied Biosystems, Foster City, CA). Real-time PCR was carried out by Applied Biosystems 7300 Real-Time PCR System using TaqMan Gene Expression Assays and TaqMan Gene Expression Master Mix (all from Applied Biosystems, Foster City, CA). Expression levels of genes were calculated using the  $2^{-\Delta\Delta C_t}$  method, with GAPDH as endogenous control. We excluded reactions with a Ct value greater than 35 in the results and all samples were tested in triplicate using 96-well plates.

### ***Data presentation and statistical analyses***

Data are presented as absolute numbers, percentages, mean ( $\pm$  standard deviation, SD) or median and quartile. Parametric distribution was explored by Shapiro-Wilk test. For microarray analysis, the filtering criteria of fold change (FC, increase or decrease)  $\geq 1.5$  and *p*-value  $< 0.05$  were employed. An unpaired t-test or Mann-Whitney U test was applied to the comparisons of relative miRNA or mRNA expression levels between control subjects and IPAH patients, and a *p*-value of less than 0.05 was considered significant.

## Supplementary Results

**Table S1. Top canonical pathways generated from target genes (N=4,664) of 21 dysregulated miRNAs identified by microarray screening in IPAH patients. Pathways are ranked by their *p*-value.**

| Ingenuity Canonical Pathways    | <i>p</i> -value | Number of target genes/Number of total genes in the pathway (%) | Number of Publications |
|---------------------------------|-----------------|-----------------------------------------------------------------|------------------------|
| Molecular Mechanisms of Cancer  | 5.3E-19         | 155/365 (42.5)                                                  | 785                    |
| HGF Signaling                   | 2.0E-14         | 59/105 (56.2)                                                   | 214                    |
| PTEN Signaling                  | 1.9E-10         | 57/118 (48.3)                                                   | 538                    |
| TGF- $\beta$ Signaling          | 2.4E-10         | 46/87 (52.9)                                                    | 564                    |
| Wnt/ $\beta$ -catenin Signaling | 4.2E-10         | 73/169 (43.2)                                                   | 407                    |
| Cardiac Hypertrophy Signaling   | 7.9E-10         | 89/223 (39.9)                                                   | 110                    |

**Table S2. Summary of miRNA qPCR assays**

| miRNA name         | Assay ID      |
|--------------------|---------------|
| <b>let-7a-5p</b>   | <b>000377</b> |
| <b>miR-26b-5p</b>  | <b>000407</b> |
| <b>miR-27b</b>     | <b>000409</b> |
| <b>miR-199a-3p</b> | <b>002304</b> |
| <b>miR-199b-5p</b> | <b>000500</b> |
| <b>miR-205-5p</b>  | <b>000509</b> |
| <b>miR-656-3p</b>  | <b>001510</b> |

**Table S3. 73 Wnt/ $\beta$ -catenin signaling pathway genes targeted by the 6 out of 11 dysregulated miRNAs**

| Gene symbol   | Type   | Location        | <i>let-7a-5p</i> | <i>miR-26b-5p</i> | <i>miR-27b-3p</i> | <i>miR-199a-3p</i> | <i>miR-199b-5p</i> | <i>miR-656</i> |
|---------------|--------|-----------------|------------------|-------------------|-------------------|--------------------|--------------------|----------------|
| <i>ACVRI</i>  | kinase | Plasma Membrane |                  |                   |                   |                    |                    |                |
| <i>ACVR1B</i> | kinase | Plasma Membrane | 1                |                   |                   |                    | 1                  |                |
| <i>ACVR1C</i> | kinase | Plasma Membrane | 1                | 1                 | 1                 |                    |                    |                |

|                |                            |                     |   |   |   |   |   |  |
|----------------|----------------------------|---------------------|---|---|---|---|---|--|
| <i>ACVR2A</i>  | kinase                     | Plasma Membrane     | 1 |   | 1 | 1 | 1 |  |
| <i>ACVR2B</i>  | kinase                     | Plasma Membrane     | 1 | 1 | 1 |   | 1 |  |
| <i>AKT2</i>    | kinase                     | Cytoplasm           | 1 |   |   |   |   |  |
| <i>APC</i>     | enzyme                     | Nucleus             |   |   | 1 |   |   |  |
| <i>APC2</i>    | enzyme                     | Cytoplasm           | 1 |   |   |   |   |  |
| <i>AXIN2</i>   | other                      | Cytoplasm           |   |   |   |   |   |  |
| <i>BMPR2</i>   | kinase                     | Plasma Membrane     |   |   |   |   |   |  |
| <i>CCND1</i>   | transcription regulator    | Nucleus             | 1 |   |   |   |   |  |
| <i>CD44</i>    | enzyme                     | Plasma Membrane     |   |   |   | 1 |   |  |
| <i>CDH2</i>    | other                      | Plasma Membrane     |   | 1 |   |   |   |  |
| <i>CDH5</i>    | other                      | Plasma Membrane     |   |   | 1 |   |   |  |
| <i>CREBBP</i>  | transcription regulator    | Nucleus             |   | 1 |   |   |   |  |
| <i>CSNK1D</i>  | kinase                     | Cytoplasm           | 1 |   | 1 |   |   |  |
| <i>CSNK1G1</i> | kinase                     | Cytoplasm           |   | 1 | 1 |   |   |  |
| <i>CSNK1G3</i> | kinase                     | Cytoplasm           |   |   |   |   |   |  |
| <i>CSNK2A1</i> | kinase                     | Cytoplasm           |   |   |   |   |   |  |
| <i>CSNK2A2</i> | kinase                     | Cytoplasm           |   |   |   |   |   |  |
| <i>DKK2</i>    | other                      | Extracellular Space |   |   | 1 |   |   |  |
| <i>DKK3</i>    | cytokine                   | Extracellular Space | 1 |   |   |   |   |  |
| <i>DVL2</i>    | other                      | Cytoplasm           |   |   | 1 |   |   |  |
| <i>DVL3</i>    | other                      | Cytoplasm           | 1 |   |   |   |   |  |
| <i>FRAT1</i>   | other                      | Cytoplasm           |   | 1 |   |   |   |  |
| <i>FRZB</i>    | other                      | Extracellular Space |   |   |   |   |   |  |
| <i>FZD3</i>    | G-protein coupled receptor | Plasma Membrane     | 1 |   | 1 |   |   |  |
| <i>FZD4</i>    | G-protein coupled receptor | Plasma Membrane     | 1 |   | 1 |   | 1 |  |
| <i>FZD5</i>    | G-protein coupled receptor | Plasma Membrane     |   |   |   |   |   |  |
| <i>FZD6</i>    | G-protein coupled receptor | Plasma Membrane     |   |   |   |   | 1 |  |
| <i>FZD7</i>    | G-protein coupled receptor | Plasma Membrane     |   |   | 1 |   |   |  |
| <i>FZD8</i>    | G-protein coupled receptor | Plasma Membrane     |   |   |   |   |   |  |
| <i>GJA1</i>    | transporter                | Plasma Membrane     |   |   |   |   |   |  |
| <i>GSK3B</i>   | kinase                     | Nucleus             |   | 1 | 1 |   | 1 |  |

|                |                                   |                 |   |   |   |   |   |  |
|----------------|-----------------------------------|-----------------|---|---|---|---|---|--|
| <i>JUN</i>     | transcription regulator           | Nucleus         |   |   |   |   |   |  |
| <i>KREMEN1</i> | other                             | Plasma Membrane | 1 |   |   |   |   |  |
| <i>LEF1</i>    | transcription regulator           | Nucleus         |   | 1 |   |   |   |  |
| <i>LRP1</i>    | transmembrane receptor            | Plasma Membrane |   |   |   |   |   |  |
| <i>LRP5</i>    | transmembrane receptor            | Plasma Membrane |   |   |   |   |   |  |
| <i>LRP6</i>    | transmembrane receptor            | Plasma Membrane |   |   | 1 |   |   |  |
| <i>MYC</i>     | transcription regulator           | Nucleus         | 1 |   |   |   |   |  |
| <i>NLK</i>     | kinase                            | Nucleus         | 1 | 1 | 1 | 1 | 1 |  |
| <i>NR5A2</i>   | ligand-dependent nuclear receptor | Nucleus         |   |   | 1 |   |   |  |
| <i>PPARD</i>   | ligand-dependent nuclear receptor | Nucleus         |   |   |   |   |   |  |
| <i>PPM1L</i>   | phosphatase                       | Cytoplasm       |   |   |   |   | 1 |  |
| <i>PPP2R2A</i> | phosphatase                       | Cytoplasm       | 1 |   |   |   |   |  |
| <i>PPP2R3A</i> | phosphatase                       | Nucleus         |   | 1 |   |   |   |  |
| <i>PPP2R5A</i> | phosphatase                       | Cytoplasm       |   | 1 |   |   |   |  |
| <i>PPP2R5E</i> | phosphatase                       | Cytoplasm       |   |   |   | 1 |   |  |
| <i>RARA</i>    | ligand-dependent nuclear receptor | Nucleus         |   |   | 1 |   |   |  |
| <i>RUVBL2</i>  | transcription regulator           | Nucleus         |   |   | 1 |   |   |  |
| <i>SFRP1</i>   | transmembrane receptor            | Plasma Membrane |   |   | 1 |   |   |  |
| <i>SFRP4</i>   | transmembrane receptor            | Plasma Membrane |   |   |   |   |   |  |
| <i>SOX4</i>    | transcription regulator           | Nucleus         |   |   | 1 |   |   |  |
| <i>SOX6</i>    | transcription regulator           | Nucleus         | 1 |   |   |   |   |  |
| <i>SOX7</i>    | transcription regulator           | Nucleus         |   | 1 |   |   |   |  |
| <i>SOX8</i>    | transcription regulator           | Nucleus         |   |   |   |   | 1 |  |
| <i>SOX11</i>   | transcription regulator           | Nucleus         | 1 | 1 |   |   | 1 |  |
| <i>SOX13</i>   | transcription regulator           | Nucleus         |   |   | 1 |   |   |  |
| <i>SOX17</i>   | transcription regulator           | Nucleus         |   |   | 1 |   |   |  |
| <i>TCF4</i>    | transcription regulator           | Nucleus         |   |   |   |   |   |  |
| <i>TCF7L2</i>  | transcription regulator           | Nucleus         |   | 1 |   |   |   |  |

|               |                         |                     |   |   |   |  |  |   |  |
|---------------|-------------------------|---------------------|---|---|---|--|--|---|--|
| <i>TGFB2</i>  | growth factor           | Extracellular Space |   |   |   |  |  | 1 |  |
| <i>TGFBR1</i> | kinase                  | Plasma Membrane     | 1 |   | 1 |  |  |   |  |
| <i>TGFBR2</i> | kinase                  | Plasma Membrane     |   | 1 |   |  |  |   |  |
| <i>TGFBR3</i> | kinase                  | Plasma Membrane     | 1 |   | 1 |  |  |   |  |
| <i>TP53</i>   | transcription regulator | Nucleus             | 1 |   |   |  |  |   |  |
| <i>WNT1</i>   | cytokine                | Extracellular Space | 1 |   |   |  |  |   |  |
| <i>WNT2</i>   | cytokine                | Extracellular Space |   |   |   |  |  |   |  |
| <i>WNT10B</i> | other                   | Extracellular Space |   |   |   |  |  | 1 |  |
| <i>WNT3A</i>  | cytokine                | Extracellular Space |   |   | 1 |  |  |   |  |
| <i>WNT5A</i>  | cytokine                | Extracellular Space |   | 1 |   |  |  |   |  |
| <i>WNT7B</i>  | other                   | Extracellular Space |   |   |   |  |  | 1 |  |

**Table S4. Selection of miRNAs for validation by qRT-PCR. The 7 miRNAs selected for qRT-PCR validation are highlighted in bold.**

| miRNA name                | p-value | FC in microarray | # Targets in Wnt/ $\beta$ -catenin | # Targets in Cancer | # Targets in HGF | # Targets in PTEN | # Targets in TGF- $\beta$ | # Targets in Cardiac hypertrophy | TGF- $\beta$ | Inflammatory | Hypoxia |
|---------------------------|---------|------------------|------------------------------------|---------------------|------------------|-------------------|---------------------------|----------------------------------|--------------|--------------|---------|
| <b><i>let-7a-5p</i></b>   | 0.047   | 1.501            | 27                                 | 43                  | 14               | 18                | 11                        | 27                               | Yes          | Yes          | Yes     |
| <i>miR-1278</i>           | 0.046   | -1.671           | 9                                  | 0                   | 0                | 0                 | 0                         | 0                                |              |              |         |
| <i>miR-197-3p</i>         | 0.046   | -1.617           | 27                                 | 13                  | 1                | 3                 | 4                         | 5                                |              |              |         |
| <b><i>miR-199a-3p</i></b> | 0.015   | 2.790            | 28                                 | 4                   | 3                | 0                 | 2                         | 3                                | Yes          | Yes          |         |
| <b><i>miR-199b-5p</i></b> | 0.046   | 2.621            | 22                                 | 22                  | 10               | 9                 | 8                         | 8                                |              |              | Yes     |
| <b><i>miR-205-5p</i></b>  | 0.005   | 5.754            | 26                                 | 17                  | 8                | 6                 | 6                         | 5                                | Yes          |              | Yes     |
| <b><i>miR-26b-5p</i></b>  | 0.048   | 2.432            | 28                                 | 33                  | 15               | 8                 | 11                        | 24                               | Yes          |              | Yes     |
| <b><i>miR-27b-3p</i></b>  | 0.045   | 1.654            | 39                                 | 57                  | 20               | 22                | 17                        | 29                               | Yes          | Yes          | Yes     |
| <i>miR-548b-3p</i>        | 0.016   | -1.883           | 16                                 | 2                   | 0                | 0                 | 1                         | 1                                |              |              |         |
| <b><i>miR-656</i></b>     | 0.030   | -2.383           | 24                                 | 0                   | 0                | 0                 | 0                         | 0                                | Yes          |              |         |
| <i>miR-99a-5p</i>         | 0.026   | 2.807            | 5                                  | 5                   | 1                | 4                 | 1                         | 3                                |              |              |         |

**Table S5. Summary of qRT-PCR validation results for Wnt/ $\beta$ -catenin signaling pathway genes**

| Gene symbol     | Description                                           | Function                                     | Fold change    | <i>p</i> -value |
|-----------------|-------------------------------------------------------|----------------------------------------------|----------------|-----------------|
| <i>WIF1</i>     | WNT inhibitory factor 1                               | Wnt inhibitor                                | 4.384          | <0.001          |
| <i>WNT5A</i>    | Wingless-type MMTV integration site family, member 5A | Wnt ligand                                   | 1.514          | 0.230           |
| <i>WNT7A</i>    | Wingless-type MMTV integration site family, member 7A | Wnt ligand                                   | 1.611          | 0.195           |
| <i>WNT16</i>    | Wingless-type MMTV integration site family, member 16 | Wnt ligand                                   | Not detectable | Not detectable  |
| <i>FZD4</i>     | Frizzled family receptor 4                            | Wnt receptor                                 | 2.342          | 0.031           |
| <i>FZD5</i>     | Frizzled family receptor 5                            | Wnt receptor                                 | 1.823          | 0.068           |
| <i>FZD10</i>    | Frizzled family receptor 10                           | Wnt receptor                                 | 14.595         | 0.003           |
| <i>GSK3B</i>    | Glycogen synthase kinase 3 beta                       | $\beta$ -catenin inhibitor complex component | 0.783          | 0.819           |
| <i>AXIN2</i>    | Axin 2                                                | $\beta$ -catenin inhibitor complex component | 2.316          | 0.017           |
| <i>APC</i>      | Adenomatous polyposis coli                            | $\beta$ -catenin inhibitor complex component | 1.346          | 0.243           |
| <i>AKT1</i>     | V-akt murine thymoma viral oncogene homolog 1         | GSK3B phosphorylation inhibitor              | 1.486          | 0.163           |
| <i>CTNNB1</i>   | Catenin (cadherin-associated protein), beta 1, 88kDa  | Wnt/ $\beta$ -catenin pathway core gene      | 2.317          | <0.001          |
| <i>CTNNBIP1</i> | Catenin, beta interacting protein 1                   | CTNNB1 and TCF family combining inhibitor    | 1.199          | 0.246           |
| <i>HDAC1</i>    | Histone deacetylase 1                                 | Downstream target inhibitor                  | 1.294          | 0.080           |
| <i>CCND1</i>    | Cyclin D1                                             | Downstream target                            | 5.639          | <0.001          |
| <i>VEGFA</i>    | Vascular endothelial growth factor A                  | Downstream target                            | 3.815          | 0.001           |

**Table S6. Number of validated gene targets of 6 miRNAs from miRWalk**

| miRNA name         | Number of gene targets |
|--------------------|------------------------|
| <i>let-7a-5p</i>   | 308                    |
| <i>miR-26b-5p</i>  | 84                     |
| <i>miR-27b-3p</i>  | 82                     |
| <i>miR-199b-5p</i> | 48                     |
| <i>miR-199a-3p</i> | 41                     |
| <i>miR-656</i>     | 1                      |



Supplementary Figures

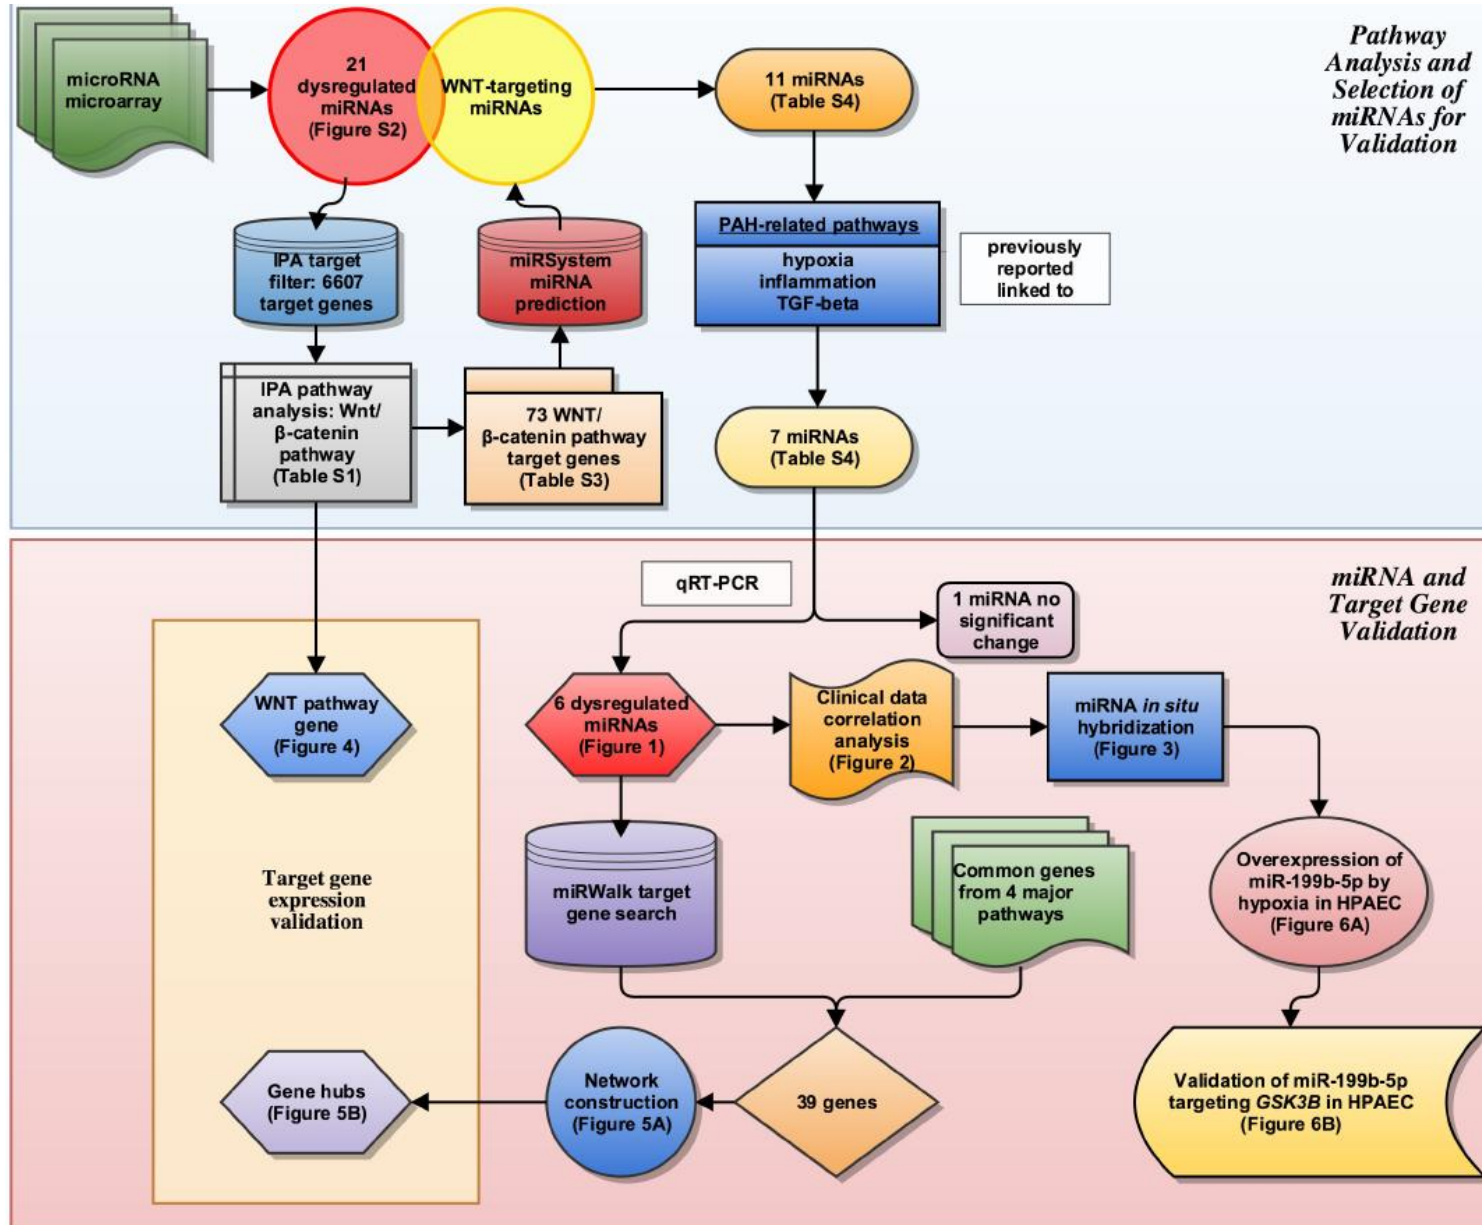

Figure S1. Study design and work flow.

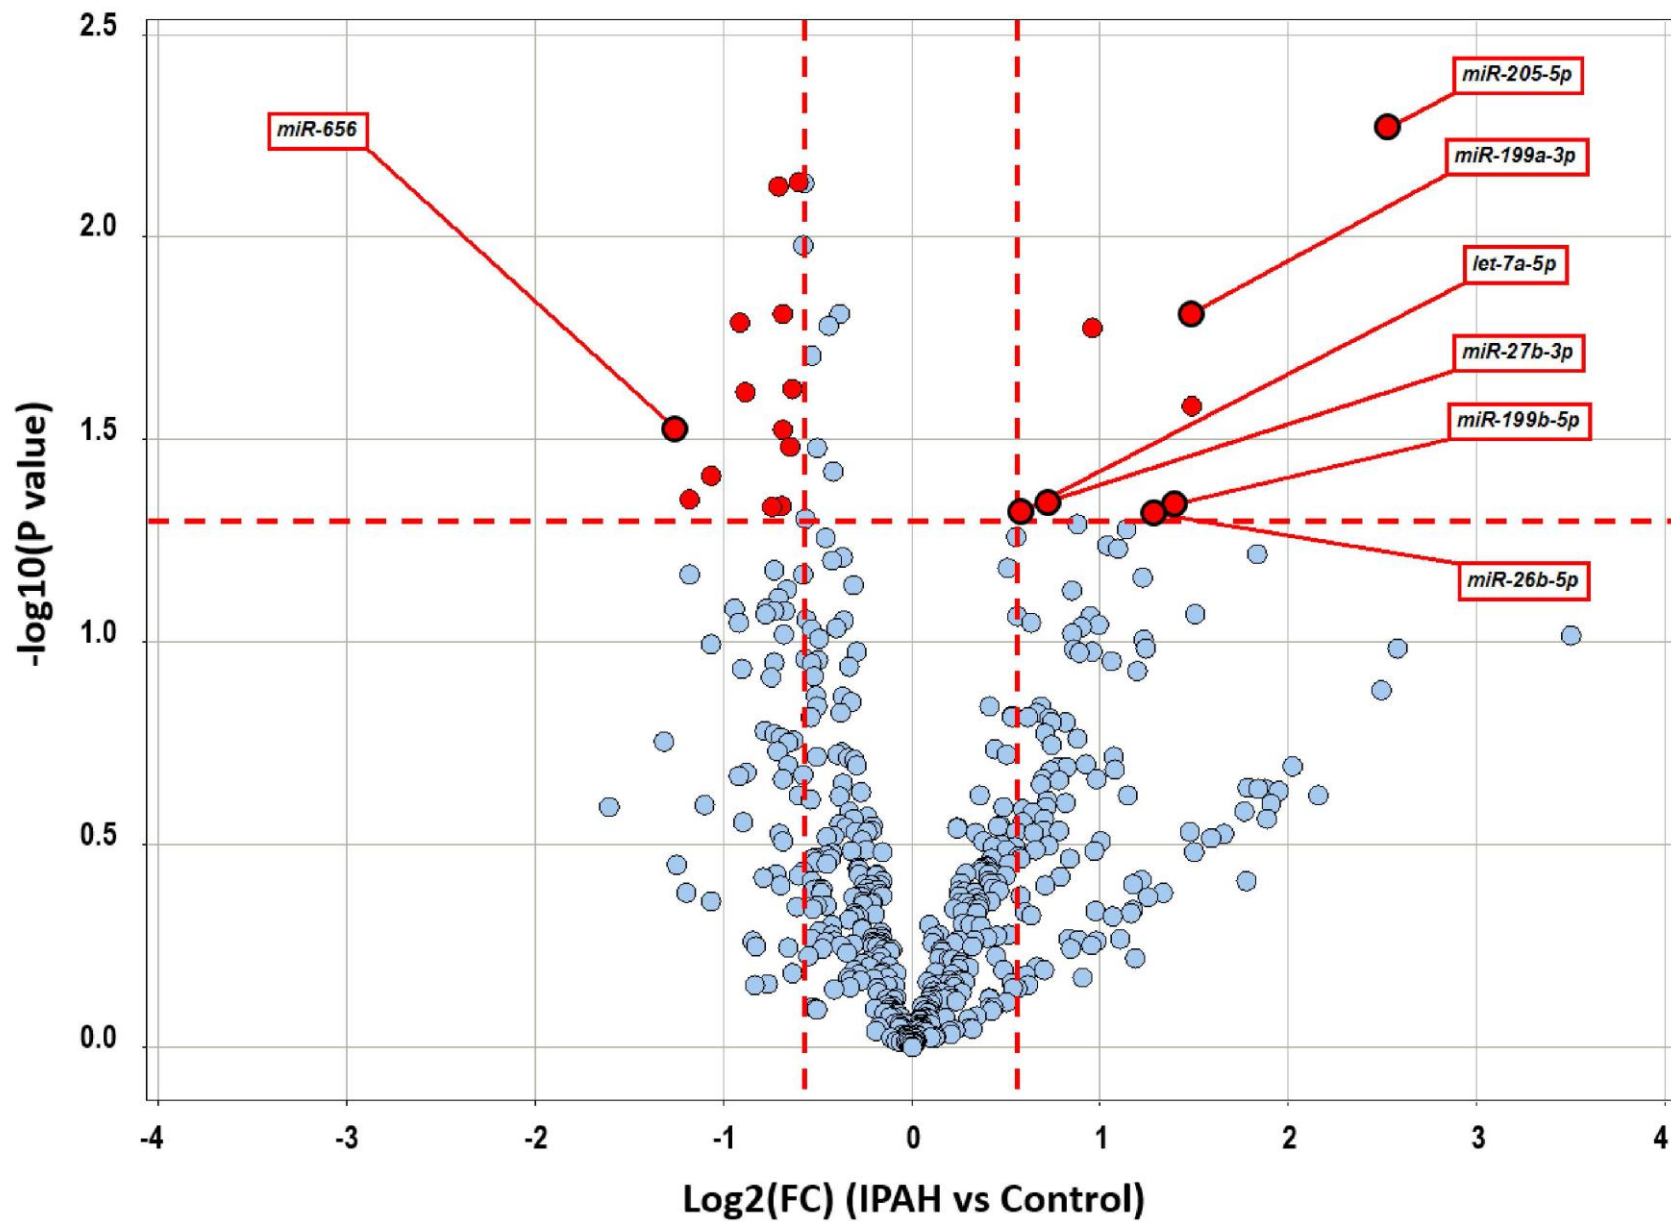

**Figure S2.** miRNA expression profiling in lung tissue of IPAH patients and controls (volcano plot). Each dot represents one probe set. The miRNAs with: 1) FC  $\geq 1.5$  in either direction (vertical lines), and 2)  $p$ -value  $< 0.05$  (horizontal line) are highlighted in red.

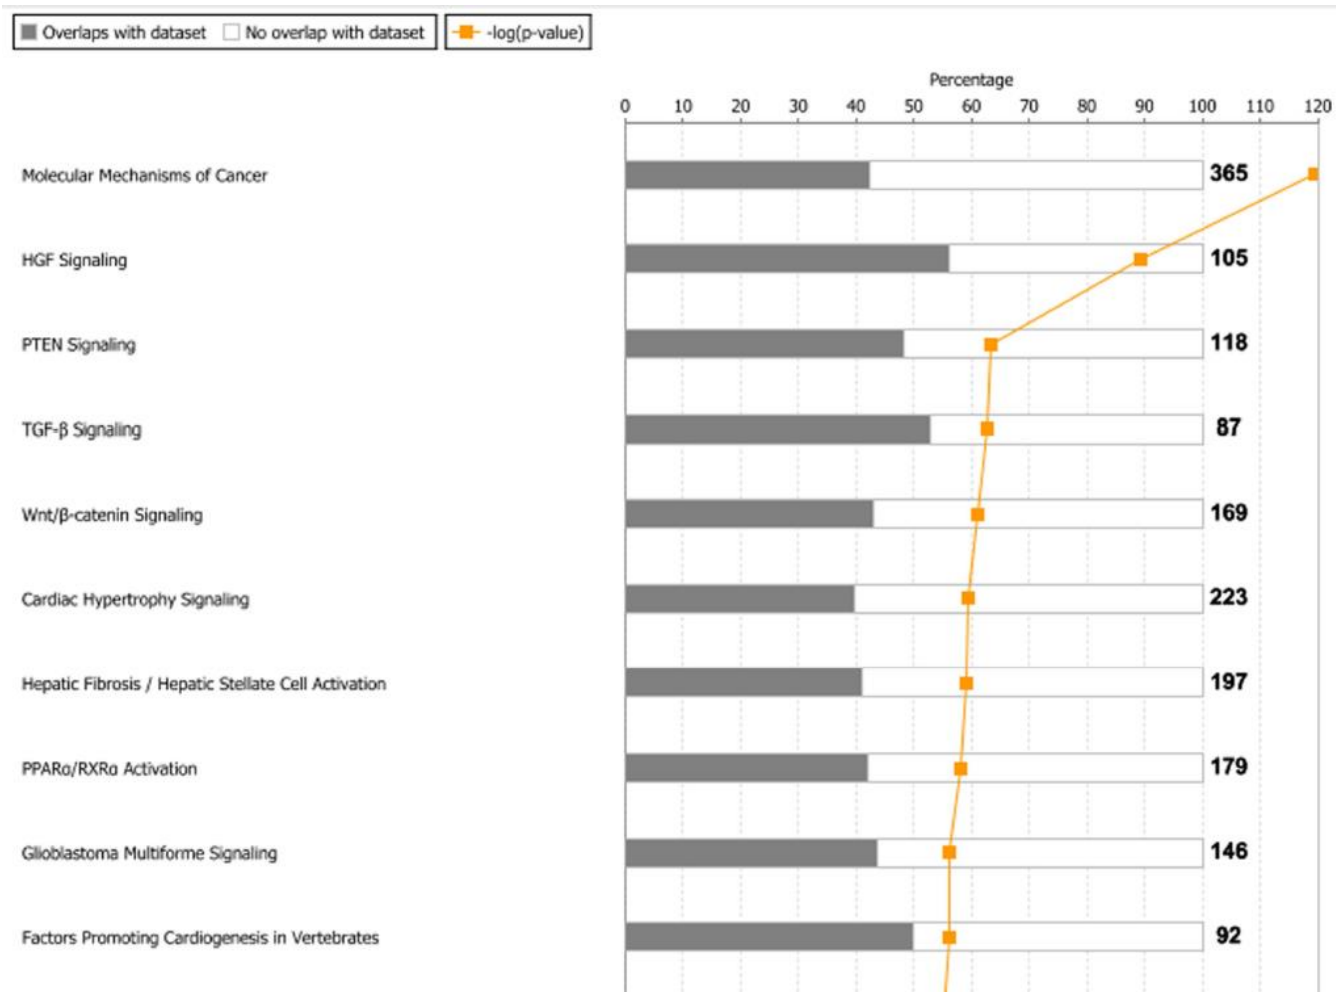

**Figure S3.** Pathway analysis by IPA shows Molecular Mechanisms of Cancer, HGF Signaling, PTEN Signaling, TGF- $\beta$  Signaling, Wnt/ $\beta$ -catenin Signaling and Cardiac Hypertrophy Signaling, Hepatic Fibrosis/Hepatic Stellate Cell Activation, PPAR $\alpha$ /RXR $\alpha$  Activation, Glioblastoma Multiforme Signaling and Factors Promoting Cardiogenesis in Vertebrates are top canonical pathways the target genes of 21 dysregulated miRNAs involved in.

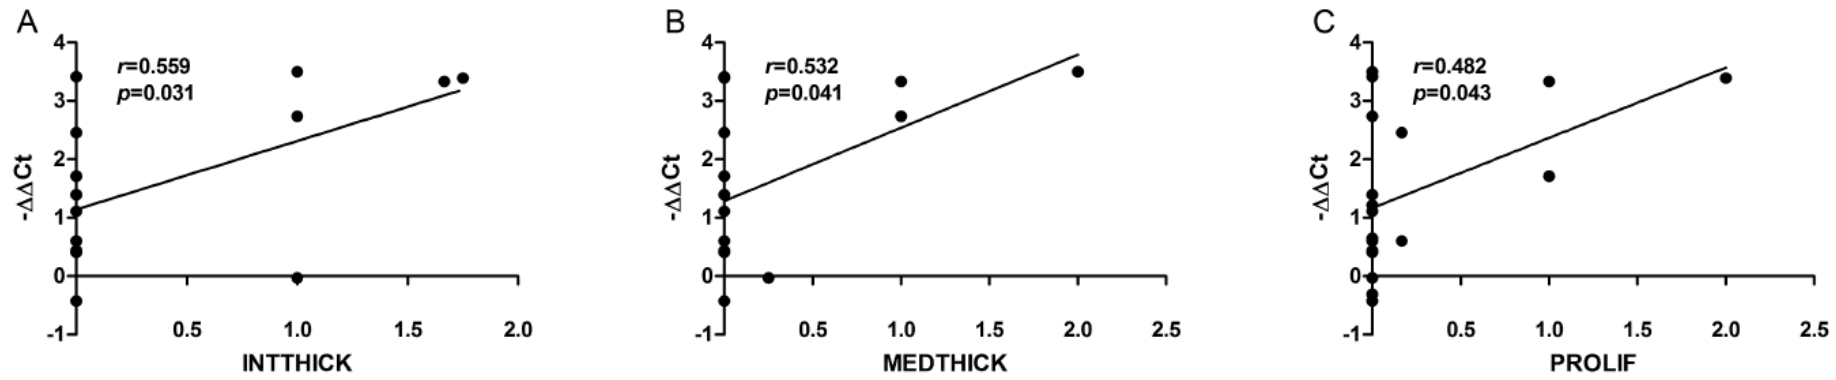

**Figure S4.** Correlations of expression level of *miR-656* with (A) intima thickening score (INTTHICK) (N=15,  $r=0.539$ ,  $p=0.031$ ), (B) media thickening score (MEDTHICK) (N=15,  $r=0.532$ ,  $p=0.041$ ) and (C) proliferated score (PROLIF) (N=18,  $r=0.482$ ,  $p=0.043$ ).

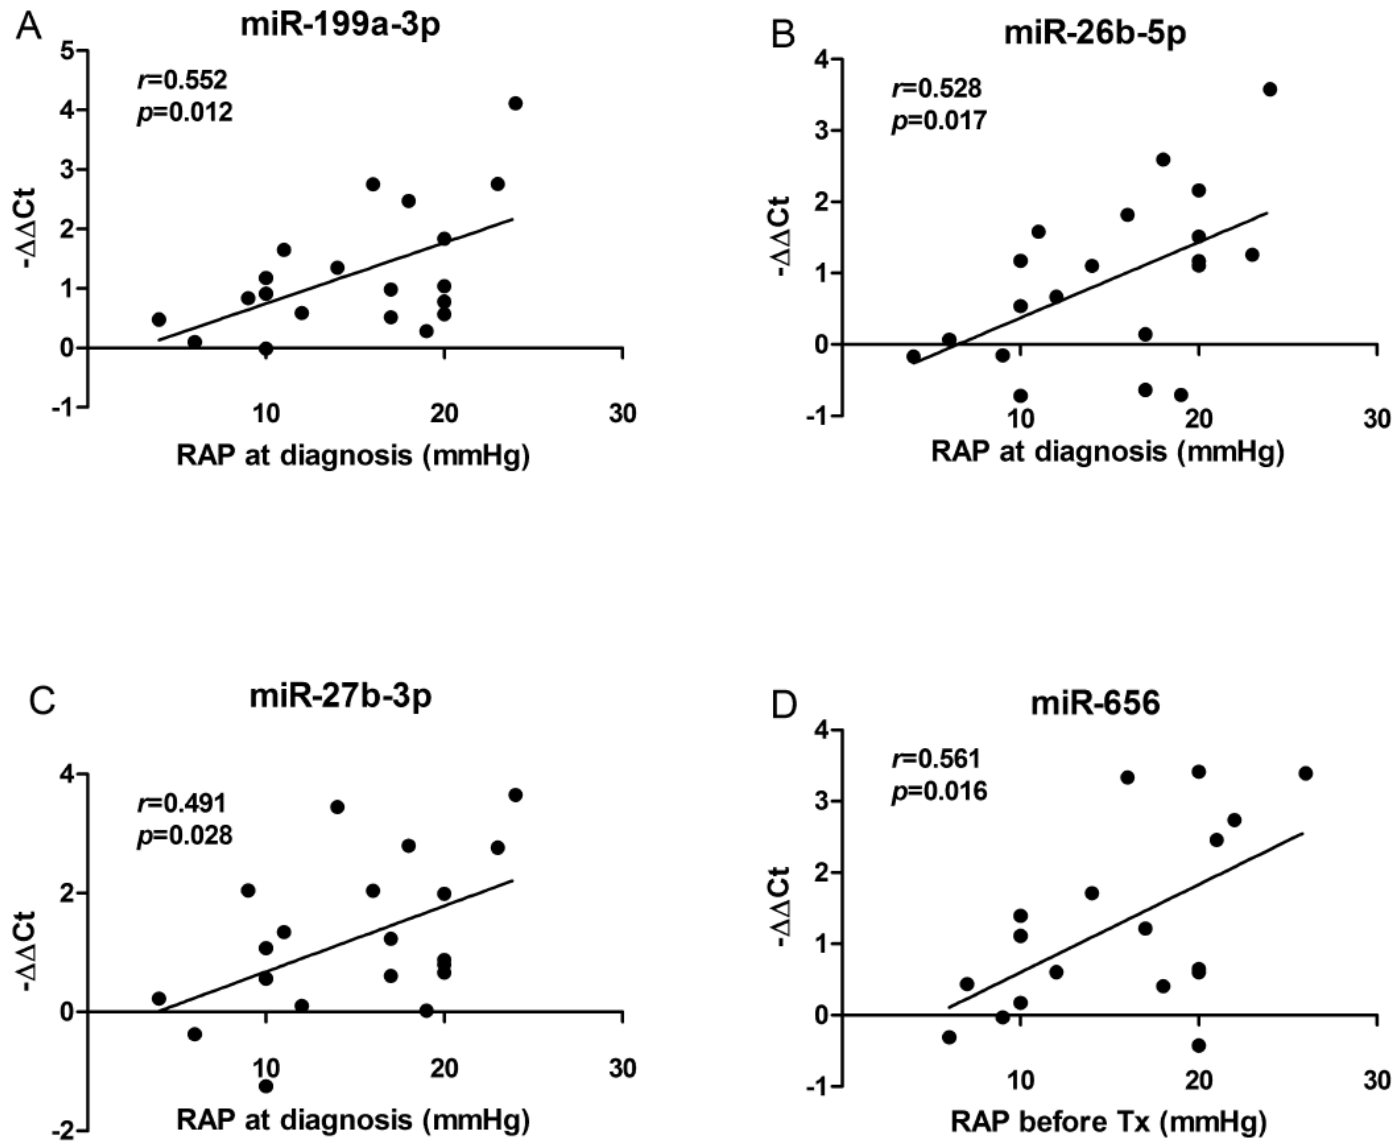

**Figure S5.** Correlations of right atrial pressure (RAP) at diagnosis with expression levels of (A) *miR-199a-3p* (N=20,  $r=0.552$ ,  $p=0.012$ ), (B) *miR-26b-5p* (N=20,  $r=0.528$ ,  $p=0.017$ ), (C) *miR-27b-3p* (N=20,  $r=0.491$ ,  $p=0.028$ ); (D) Correlation of RAP before transplantation with expression level of *miR-656* (N=18,  $r=0.561$ ,  $p=0.016$ ).

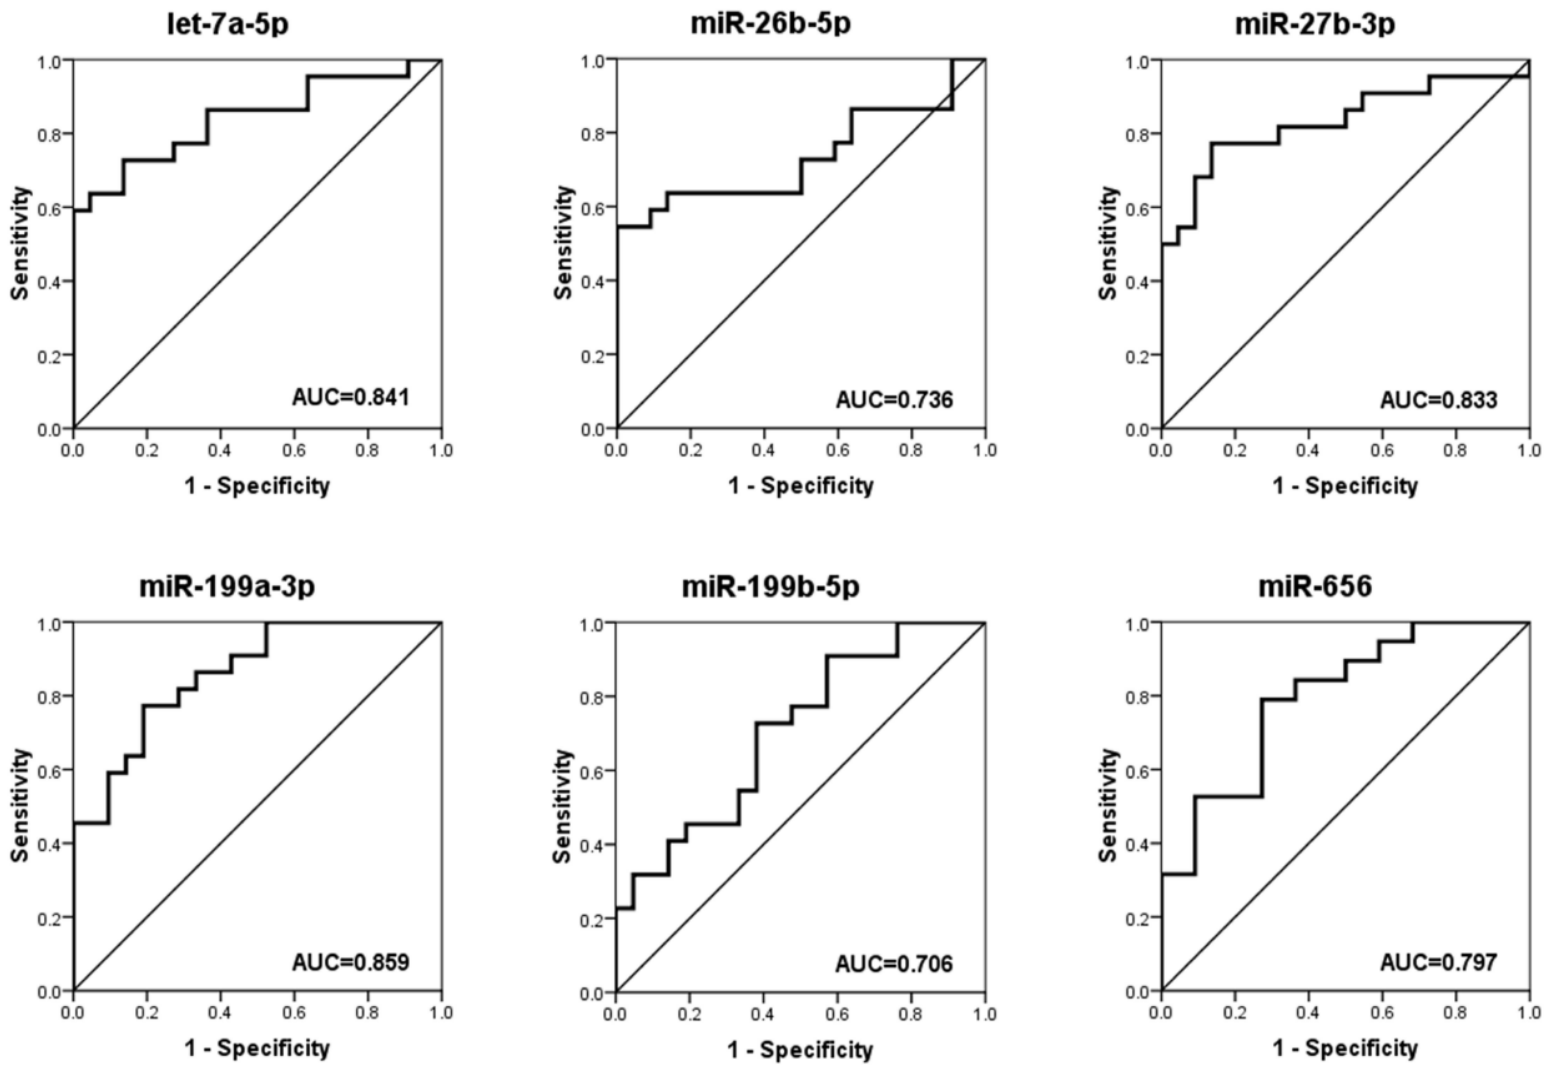

**Figure S6.** Receiver operating characteristic (ROC) curves showing the relationship between tissue levels of *let-7a-5p*, *miR-26-5p*, *miR-27b-3p*, *miR-199a-3p*, *miR-199b-5p*, *miR-656* and the diagnosis of IPAH.

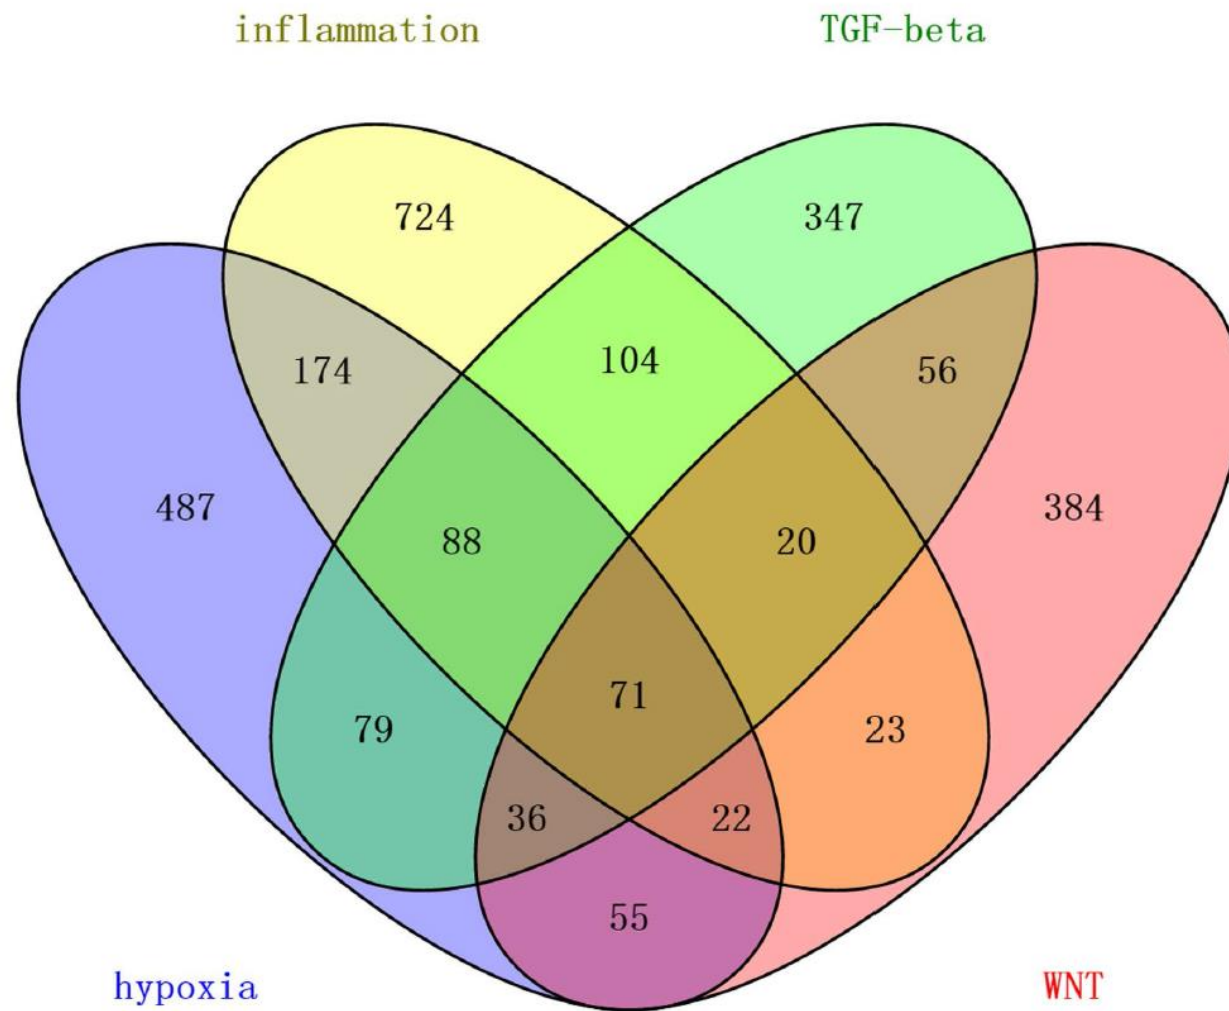

**Figure S7.** Common genes in 4 pathways associated with PAH. A total number of 71 genes are common genes in hypoxia, inflammation, TGF- $\beta$  and Wnt pathways.

4 pathway common

Targets of 6 miR

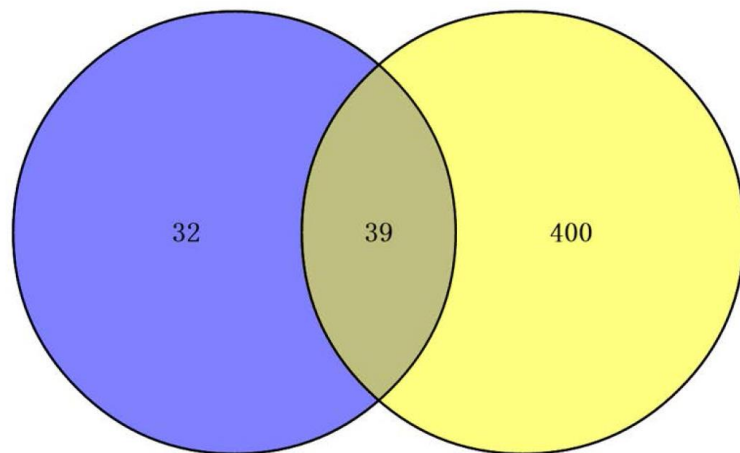

**Figure S8.** Confirmation of the genes for network construction. Venn diagram shows 39 genes are validated miRNA targets which involved in 4 pathways.

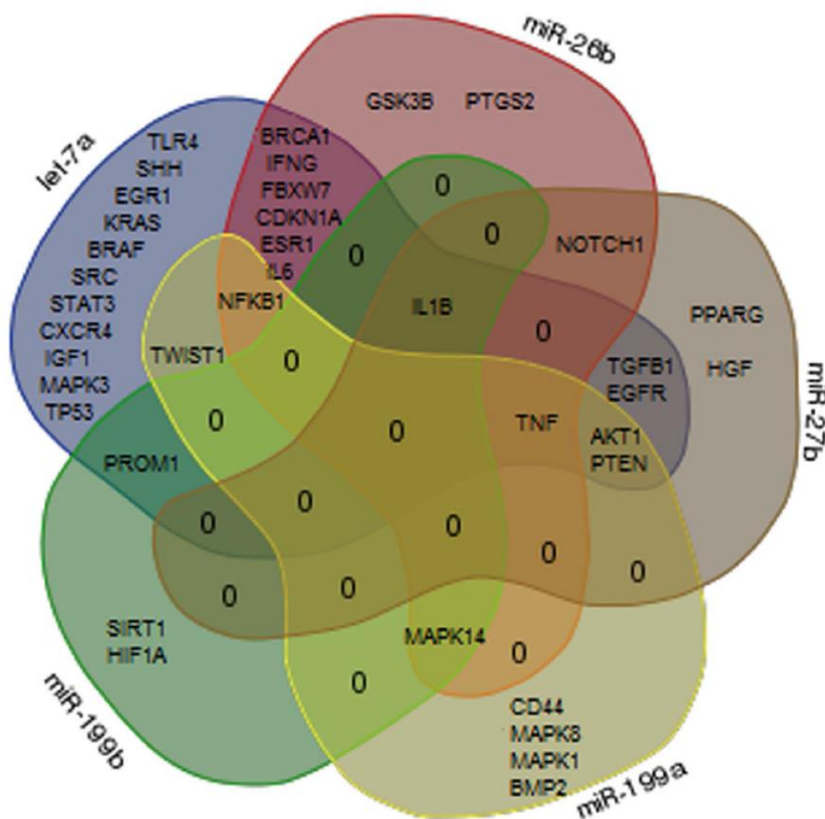

**Figure S9.** Venn diagram showing target gene distribution of each miRNA. No target gene of *miR-656* is involved in 4 pathways.



let-7a-5p

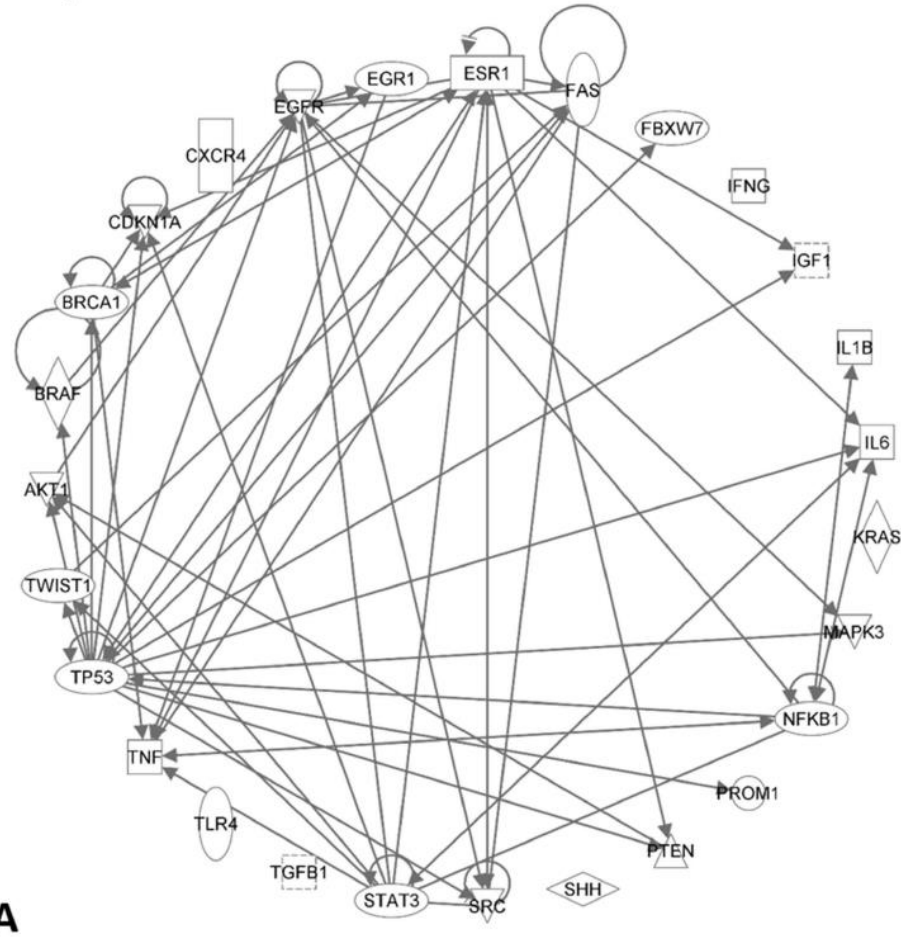

miR-26b-5p

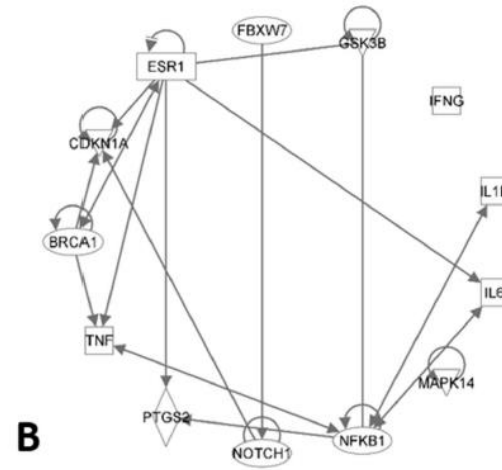

B

miR-199a-3p

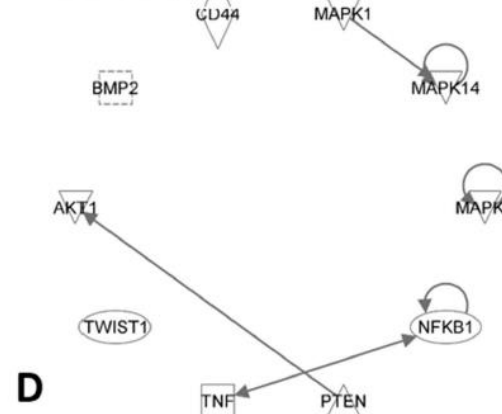

D

miR-27b-3p

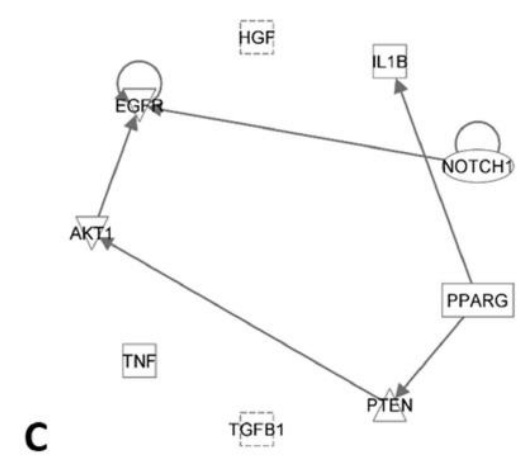

C

miR-199b-5p

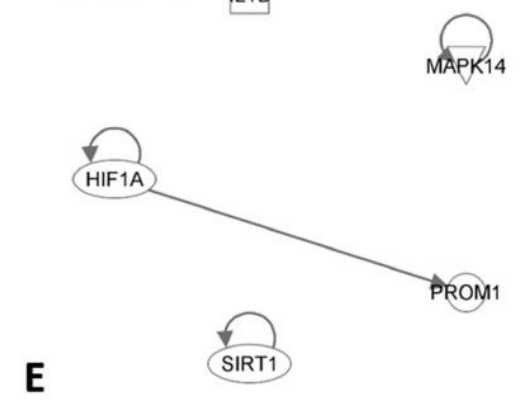

E

**Figure S10.** Gene-gene interaction network showing experimentally observed direct interactions between gene targets of: A) *let-7a-5p*; B) *miR-26b-5p*; C) *miR-27b-3p*; D) *miR-199a-3p*; E) *miR-199b-5p*. All genes are involved in all four pathways: hypoxia, inflammation, TGF- $\beta$  and Wnt.

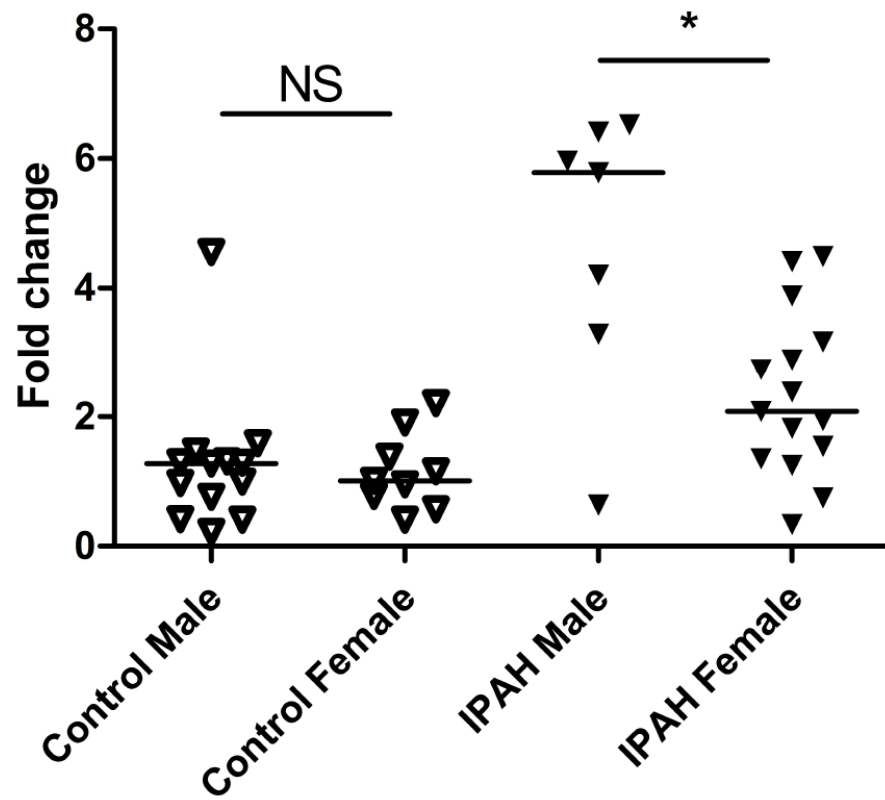

**Figure S11.** ESR1 expression levels in different groups and genders. The expression level of ESR1 in male IPAH patients is significantly higher than that in female patients. But there is no significant difference between male controls and female controls.
